***Factors influencing healthcare providers' knowledge and skills retention following helping mothers survive and helping babies survive training in Tanzania: A mixed methods cross-sectional study***

Beatrice Erastus Mwilike<sup>1\*</sup>, Martha Rimoy<sup>2</sup>, Lucy Mabada<sup>2</sup>, Nicodem Komba<sup>2</sup>, Feddy Mwangi<sup>2</sup>, Rashid Gosse<sup>1</sup>, Joel Ambikile<sup>3</sup>

Affiliations:

1. Department of Community Health Nursing, Muhimbili University of Health and Allied Sciences, Dar es Salaam, Tanzania
2. Tanzania Midwives Association (TAMA), Dar es Salaam, Tanzania
3. Department of Clinical Nursing, Muhimbili University of Health and Allied Sciences, Dar es Salaam, Tanzania

\*Corresponding author

Beatrice Erastus Mwilike

E-mail: [beatyerastus@gmail.com](mailto:beatyerastus@gmail.com)

Phone: [+255 712 620 924](tel:+255712620924)

## 1 Abstract

2 The Tanzanian Midwives Association (TAMA), in collaboration with development  
3 partners, implemented a project (*50,000 Happy Birthdays*) from 2018 to 2020 to improve  
4 providers' knowledge and skills in saving lives at birth. The project was implemented  
5 under two training modules namely *Helping Mothers Survive* (HMS) and *Helping Babies*  
6 *Survive* (HBS). Through a mixed-methods cross-sectional design, knowledge retention  
7 was assessed by comparing follow-up and post-test knowledge scores among healthcare  
8 providers in the selected health facilities in Tanga, Geita, and Katavi regions. Four  
9 knowledge areas were evaluated using a written test and five skills areas were assessed  
10 using skills observation checklists for each. Quantitative data was analyzed using IBM  
11 SPSS version 25 by performing descriptive analysis, *t*-test and One-Way ANOVA with  
12 the level of significance determined at  $p < 0.05$ . Qualitative analysis was conducted  
13 through a thematic analysis approach and themes were generated to describe the factors  
14 influencing retention. 210 respondents participated in the study with more than half  
15 holding diploma ( $n=116$ ; 55.2%) and working in urban area ( $n=123$ ; 58.6%). There was  
16 a statistically significant drop in mean knowledge scores for controlling bleeding after  
17 birth ( $t=15.404$ ,  $p<0.001$ ), in helping babies breathe ( $t=8.580$ ,  $p<0.001$ ), and in essential  
18 care for small babies ( $t=19.620$ ,  $p<0.001$ ). Working in a rural area had a statistical  
19 significant higher drop in mean knowledge scores for managing pre-eclampsia ( $F=4.491$ ,  
20  $p=0.035$ ) and for helping babies breathe ( $F=5.005$ ,  $p=0.026$ ). Education level also showed  
21 a significant difference in the mean knowledge score for managing pre-eclampsia  
22 ( $F=4.850$ ,  $p=0.003$ ).

23 There was poor knowledge retention following receiving training on HMS and HBS. The  
24 level of professional education and residential area significantly influenced knowledge

25 retention. Frequent refresher training and other relevant training among healthcare  
26 workers may be helpful in knowledge retention regarding maternal and neonatal care,  
27 with much emphasis on providers working in rural areas and those with lower level of  
28 professional education.

29

30 **Keywords:** Knowledge, Post-training, Helping mothers survive, Helping babies survive,  
31 Tanzania

## 32 **Introduction**

33 Despite the global, regional, and local efforts to improve maternal and neonatal services,  
34 maternal and neonatal mortality have remained major public health issues for decades,  
35 particularly in low- and middle-income countries (LMICs). Globally, every two minutes,  
36 a woman dies from preventable causes related to pregnancy, which is statistically  
37 equivalent to approximately 800 maternal deaths per day [1]. Of these, almost 95% occur  
38 in LMICs [1, 2], with the limited skills of the birth attendants being one of the leading  
39 factors [2, 3]. Besides, approximately 6,500 newborns (within the first 28 days of birth)  
40 die every day. In 2022, 2.3 million newborns died in the first month of life, accounting  
41 for about 47 percent of all under-five deaths [4], mainly attributed to a lack of quality care  
42 at birth or skilled care and treatment immediately after birth and in the first days of life  
43 [5].

44 According to the 2022 Tanzania Demographic Health and Malaria Indicator Survey  
45 (TDHS - MIS), the maternal mortality ratio (MMR) was 104 maternal deaths per 100,000  
46 live births, indicating a notable decline in MMR from 556 per 100,000 live births in  
47 2015/2016 [6], and a step forward towards achieving the Standard Developmental Goal  
48 (SDG) 3.1 target of reducing MMR to less than 70 deaths per 100,000 live births by 2030  
49 [7]. Unlikely, the neonatal mortality rate has been stagnant over the past two decades,  
50 decreasing at a slow pace from 40 deaths per 1,000 live births in 1999 to 25 deaths per  
51 1,000 live births in 2015/2016 to 24 deaths per 1,000 live births in 2022 [6], indicating  
52 slow progress towards achieving the SDG 3.2.2 target of ending preventable newborn  
53 deaths by 2030 [7].

54 To reach the SDG 3.1 and 3.2.2 targets, deliberate analysis and corresponding  
55 interventions are needed across various settings, with extensive focus on those showing

56 sluggishness in progress [6, 7]. Recently, the Tanzanian government has increased health  
57 infrastructure by building new health facilities and expanding the existing ones in an  
58 effort to improve accessibility to health services, including reproductive, maternal,  
59 newborn, and child health (RMNCH) services [8]. Subsequently, services such as  
60 caesarean sections, which were mainly provided at referral and tertiary hospitals, have  
61 been decentralized to primary healthcare settings, particularly district hospitals and health  
62 centers that meet the criteria. Despite these efforts, the skilled health personnel needed to  
63 provide quality services in these health facilities, as per the World Health Organization  
64 (WHO) recommendation, is one of the critical challenges [9, 10]. The WHO recommends  
65 high-quality care for all women during the antenatal, intranatal, and postnatal periods [11]  
66 and that all births be attended by skilled birth attendants (SBA) who are supplied with the  
67 necessary requirements, including in-service training [11, 12]. Yet, Tanzania faces an  
68 estimated half-shortage of skilled health workforce [13], and a notable shortage of SBA  
69 [14]. In fact, 66% of maternal deaths and 43% of newborn deaths can be prevented in  
70 births that occur with the assistance of SBAs who are supported and trained in basic life-  
71 saving competencies [15, 16], and one of the strategies to achieve the SDG 3.1 target by  
72 2030 is to have at least 90% of births attended by SBA [7].

73 In response to this shortage and the need for high-quality services, in-service training has  
74 been implemented in multiple settings to strengthen the knowledge, skills, and  
75 performance of healthcare providers in maternal and newborn care units [17–20]. These  
76 trainings take into account various approaches and implementation frameworks, even  
77 though the content is quite similar [17, 21]. Of these, Helping Mothers Survive (HMS)  
78 and Helping Babies Survive (HBS) programs have been implemented as innovative  
79 training strategies that are cost-effective while meeting the demands for more basic and

80 practical training, particularly in resource-limited settings [17, 22, 23]. It is mainly  
81 focused on the management of the leading contributors to maternal and neonatal deaths,  
82 including controlling bleeding after birth, active management of the third stage of labour,  
83 administration of magnesium sulphate, manual removal of the placenta, helping babies  
84 breathe, essential care for small babies, and feeding with a nasogastric tube [22, 23]. HMS  
85 and HBS training have shown varying effectiveness in the settings where they have been  
86 implemented. A review conducted in Tanzania reports a notable improvement in  
87 knowledge, skills, and performance among SBA and a reduction in early neonatal deaths  
88 and fresh stillbirths following in-job training on neonatal resuscitation [24]. Similarly,  
89 reviews from other regions have also highlighted post-training increases in knowledge,  
90 skills, and confidence [25, 26]. Even though, in terms of clinical practice, some studies  
91 have reported improvement [27–30], while others have reported no significant  
92 improvement [31]. It is further recommended that for better maternal and neonatal  
93 outcomes, multifaceted interventions with structured follow-up interventions are rather  
94 encouraged than single interventions or interventions with no follow-up [25, 26, 32].  
95 Although HBS and HMS programs have shown significant impact in terms of  
96 improvement of knowledge and skills [28], post-training follow-up surveys show a  
97 decline in knowledge and skills [33, 34]. A training in rural Tanzania among SBA led to  
98 an improvement in knowledge, skills, and confidence immediately post-training [33], but  
99 a nine-month follow-up revealed a decline in knowledge and simulated skills [35].  
100 Similarly, a cluster-randomised trial involving 61 facilities in Tanzania revealed a decline  
101 of skills to 4.0% at a 10-month follow-up of in-facility training on helping mothers  
102 survive bleeding after birth (HMS BAB) [34]. This entails the short-term retention of  
103 knowledge, skills, and competencies gained in training, thus necessitating the need to find

104 out the factors that may be influencing post-training retention of knowledge and skills.  
105 Previous studies in other settings have highlighted factors such as frequency of training,  
106 years of clinical experience [36, 37], cadre variations [37, 38], and training modality [38].  
107 However, they are not comprehensive enough to inform about knowledge and skill  
108 retention in our context.

109 Therefore, as we owe it to enhance the training outcomes in terms of long-term retention  
110 of knowledge and skills and subsequent improved clinical outcomes, our study aimed at  
111 exploring the factors influencing healthcare providers' knowledge and skills retention  
112 following helping mothers survive and helping babies survive training in Tanzania, as  
113 they are not yet clear. In 2018 to 2020 the healthcare providers received training through  
114 a programme known as 50,000 Happy Birthdays (50KHB). The programme aimed to  
115 increase the professional capacity of midwives in three countries: Ethiopia, Rwanda and  
116 Tanzania. This was a post-training follow-up survey conducted among the healthcare  
117 providers who previously received HMS and HBS training mainly in four knowledge and  
118 five skills areas. We, therefore, aimed to assess the factors influencing competence  
119 retention following HMS and HBS in Tanzania.

120

## 121 **Materials and Methods**

### 122 **Study setting**

123 This study was conducted in six purposefully selected districts in three *50,000 Happy*  
124 *Birthday* project regions of mainland Tanzania namely Geita, Tanga and Katavi. The  
125 districts were Geita Town Council, Chato District Council, Tanga Town Council, Muheza  
126 District Council, Mpanda District Council and Mpanda Town Council. These districts

127 were selected from regions where the 50KHB programme was conducted and impact  
128 evaluated. For each of the six districts, the team randomly selected three health facilities  
129 of different levels among those facilities which were part of the project. In each region,  
130 facilities were selected using the following criteria:

131 (i) Facilities that have providers who are already trained on HMS and HBS modules.

132 (ii) For the three regions selected, selected a mix of facilities that represent hospital,  
133 health center and dispensary.

134 (iii) Facilities representing urban, and rural contexts from each region.

135

### 136 **Study design**

137 Our study utilized a mixed-methods cross-sectional design to compare the current  
138 situation at selected sites with endline data from the *50,000 Happy Birthdays* project.  
139 Leveraging existing master trainers in each region for efficient and consistent data  
140 collection, the study employed standard *HMBS* evaluation documents – multiple-choice  
141 knowledge assessments and objective structured clinical evaluations (OSCEs) – as well  
142 as supplemental tools like facility-level interviews, clinical observations, and desk  
143 reviews to capture all relevant qualitative and quantitative information that may influence  
144 results.

145 We engaged a significant and representative sample of study participants to ensure that  
146 the findings can be applied to national best practices: we identified a diverse array of  
147 health facilities (district hospitals, health centres, dispensaries) and maternal/newborn  
148 service providers from each of the three project regions to evaluate. A subsequent,  
149 centralised analysis was conducted to understand common factors associated with  
150 competence retention among providers.



## 151 **Study Participants**

152 This study involved two different populations: healthcare providers and tutors. Healthcare  
153 providers and tutors were enrolled from the following target populations:

154 **Target population 1** – Healthcare providers from selected health facilities who have been  
155 trained on HMS and HBS modules.

156 **Target population 2** – Supervisors, DRCHCOs and RRCHCOs, and educators who have  
157 been trained, and are proficient in the provision of maternal newborn and childcare in  
158 their contexts.

159 **Target population 3** – Tutors who were trained on HMS and HBS modules in the  
160 selected Nursing and Midwifery Colleges.

161

## 162 **Inclusion and exclusion criteria**

163 Healthcare providers (HCPs) and tutors were eligible for inclusion in the study if they  
164 were currently living in Geita, Katavi and Tanga regions, were classified as being one of  
165 the three target populations and had consented to participate in skills drills, focus groups  
166 or interviews. Participants were excluded if they were sick or on study leave and they  
167 plan to move from the region during the study period.

168

## 169 **Sampling Methods and Procedure**

### 170 **Sampling for Quantitative Research**

171 All the trained providers in the 28 purposively selected facilities and three training  
172 institutions were approached and enrolled in the study if they consented. Healthcare  
173 providers and tutors from selected health facilities who have been trained in HMS and  
174 HBS modules were recruited. Consecutive recruitment was employed until all the trained

175 providers available were enrolled. Below in table 1 is the list of Health facilities and  
 176 Training centers supported under 50KHB projects in Tanga, Geita, and Katavi regions.  
 177 Overall, we were able to access a total of 210 participants from all the study sites (**Table**  
 178 **1**).

| <b>Table 1. Sample of the study sites</b> |                                                               |                                                                          |                                                                                               |
|-------------------------------------------|---------------------------------------------------------------|--------------------------------------------------------------------------|-----------------------------------------------------------------------------------------------|
|                                           | Tanga                                                         | Geita                                                                    | Katavi                                                                                        |
| <b>District</b>                           | <b>Tanga Town Council</b>                                     | <b>Geita Town Council</b>                                                | <b>Mpanda Municipal Council</b>                                                               |
| <b>Education institution</b>              | Tanga COHAS                                                   | Geita School of Nursing                                                  | n/a                                                                                           |
| <b>Hospital</b>                           | Bombo Regional Referral Hospital                              | Geita Regional Referral Hospital                                         | Katavi Referral Regional Hospital                                                             |
| <b>Primary health facilities</b>          | Ngamiani HC, Mikanjuni HC, Duga dispensary                    | Nyankumbu HC, Kasamwa HC, Bung’wankoko dispensary                        | Town council clinic, Kakese dispensary, Mwamkulu dispensary                                   |
| <b>District</b>                           | <b>Muheza District Council</b>                                | <b>Chato District Council</b>                                            | <b>Mpanda District council</b>                                                                |
| <b>Education institution</b>              | St. Augustine Muheza IHAS                                     | n/a                                                                      | n/a                                                                                           |
| <b>Hospital</b>                           | Muheza DH                                                     | Chato DH                                                                 | n/a                                                                                           |
| <b>Primary health facilities</b>          | Mkuzi HC, Bulwa HC, Misozwe dispensary, Mkanyageni dispensary | Bwanga HC, Buzilamoyo dispensary, Butalama dispensary, Kibehe dispensary | Mwese HC, Mishamo HC, Kalema HC, Katuma dispensary, Sibwesa dispensary, Kasekeseke dispensary |

179

180

## 181 **Sampling for Qualitative research**

182 The sampling of providers was purposive to meet the desirable characteristics. Providers  
183 were selected from diverse backgrounds to collate feedback from participants of different  
184 socio-demographic characteristics. Focus groups were arranged to include groups of  
185 similar characteristics. Participants included supervisors, DRCHCOs, RRCHCOs, and  
186 educators who have been trained and are proficient in the provision of maternal, newborn  
187 and childcare in their contexts.

188 The final sample sizes were based on theoretical saturation, which refers to the point at  
189 which no new concepts emerge from the review of data drawn from a sample that is  
190 diverse in pertinent characteristics and experiences. We achieved theoretical saturation  
191 after having three focus groups with target populations composed of 12 participants each.  
192 Also, we conducted a total of 16 in-depth interviews across all three regions.

193

## 194 **Data collection method and procedures**

195 Data was collected from January to March 2023, approximately two years following the  
196 online survey for the 50,000 Happy Birthday project. The assessment of HCPs'  
197 knowledge and skills utilized qualitative and quantitative approaches, including in-depth  
198 interviews, OSCE, and questionnaires. Participants were recruited from the three regions  
199 from 16 January until 31 March 2023.

200

201 **Qualitative data** from interviews and discussions were collected using an audio recorder.  
202 Data were then transcribed verbatim and translated from Kiswahili into English. For  
203 qualitative data collection, an interview guide will be used. Data were collected by a team

204 of main researchers. The interviews lasted for about 30 to 60 minutes and were conducted  
205 in Kiswahili language.

206

207 **Quantitative data** were collected using the modified tools that were used for pre and  
208 posttest during the 50,000 Happy Birthday program intervention. The questionnaires were  
209 paper printed and participants were asked to fill in after providing signed informed  
210 consent. The researchers and research assistants were responsible for data collection.

211 Tools were prepared to assess the knowledge and skills retention in HMS and HBS among  
212 healthcare providers and tutors. The assessment focused on both knowledge and skills in  
213 managing two HMS modules (Bleeding After Birth Complete (BABC) and Pre-  
214 Eclampsia/Eclampsia (PEE)) and three HBS modules (Helping Babies Breathe (HBB2.0),  
215 Essential Care for Every Baby (ECEB) and Essential Care for Small Babies (ECSB)).

216 The knowledge test tools comprise of socio demographic information and multiple-choice  
217 questions for different topics covered during the training. The skills test tools comprise  
218 of socio demographic information, instructions for conducting the skills and observation  
219 checklists.

220 The knowledge test for HMS tools included a) Helping Mothers Survive: Bleeding after  
221 Birth Complete Knowledge Assessment b) Helping Mothers Survive: Knowledge Test  
222 Pre-Eclampsia & Eclampsia. The skills test for HMS tools included OSCE for a) Active  
223 Management of Third Stage of Labour (AMTSL) b) Shock Management, and c)  
224 Administering the loading dose of MgSO<sub>4</sub>. The knowledge test for HBS tools included  
225 a) Essential Care for Every Baby Knowledge Check b) Essential Care for Small Babies:  
226 Knowledge check. The skills test for HBS tools included a) Helping baby breath and b)  
227 Care for small babies.

228

## 229 **Data analysis**

### 230 *Quantitative data analysis*

231 Quantitative data from questionnaires were transferred to an Excel database and later to  
232 Statistical Package for the Social Sciences (SPSS) version 25 for analysis. Descriptive  
233 analyses were conducted using frequency, central tendencies, and other relevant methods  
234 to establish follow up knowledge and skills retention. Similarly, these measures were used  
235 in determining the impact of the training program on improvement of the maternal and  
236 neonatal health outcomes. Data were compiled, cleaned, and analyzed for each specific  
237 objective as shown in the following Table 2.

238

### 239 *Qualitative data analysis*

240 This study utilized deductive-inductive thematic analysis approach to identify, analyze,  
241 and interpret patterns within the qualitative data. The audio recording information was  
242 transcribed and transcripts in Swahili language were prepared. The researchers read  
243 through the translated scripts repetitively and compare them with the original audio record  
244 to check for accuracy. Thereafter, a list of meaningful information found was made and  
245 codes assigned. Then, the list was classified into themes and each theme was classified  
246 into sub-themes. Then, the data was translated and be presented in a text form. Validity  
247 in qualitative data based on triangulation, member checking, and collaboration with other  
248 investigators.

249

## 250 **Ethical approval**

251 The ethical approval for this study was obtained from the Muhimbili University of Health  
252 and Allied Sciences Research and Ethics Committee with Ref.No.DA.282/298/01.C/.  
253 Permission to conduct the study was sought from the Ministry of Health (MoH), the  
254 President's Office Regional Administration and Local Government (PORALG), and from  
255 regional and council/municipal authorities – with information being transmitted to facility  
256 authorities. Participation in this study was voluntary and participants were required to  
257 sign the written informed consent form. Time compensation was given to the participants  
258 after the interviews. The research team ensured that data remains confidential, and no  
259 identification will be published along with the reports of manuscripts. Interviews were  
260 conducted in isolated rooms to ensure confidentiality and data will be stored in locked  
261 cabinet in TAMA offices for a period of five years.

262

## 263 **Results**

### 264 **Characteristics of the study participants**

265 A total of 210 healthcare providers participated in the study, with the mean (SD) age of  
266 35.7 (7.5), and most of them (n=145; 69.0%) were females. The majority (n=116; 55.2%)  
267 were diploma holders, followed by certificate holders (n=76; 36.2%), and just more than  
268 a half (n=110; 52.4%) were working in a regional or district referral hospital. The region  
269 with the highest number of participants was Geita (n=78; 37.1%) followed by Tanga  
270 (N=70: 33.3%), with Geita and Tanga municipal councils contributing to most  
271 participants (n=47; 22.4% and n=46: 21.9%, respectively). Regarding the residential area  
272 (not shown in table), more than half (n=123; 58.6%) of the participants were working in  
273 health facilities located in the urban area (**Table 2**).

**Table 2. Demographic characteristics of participants and mean follow-up knowledge and skills scores for managing mothers and babies during and after child birth (n=210)**

|                  |                  | Knowledge Scores |      |           |      |              |      |           |      |           |      | Skills Scores |      |           |      |                     |      |           |      |           |      |  |
|------------------|------------------|------------------|------|-----------|------|--------------|------|-----------|------|-----------|------|---------------|------|-----------|------|---------------------|------|-----------|------|-----------|------|--|
|                  |                  | n                | %    | CBAB      |      | Preeclampsia |      | HBB       |      | ECSB      |      | MRP           |      | AMTSL     |      | AdMgSO <sub>4</sub> |      | HBB       |      | FNGT      |      |  |
|                  |                  | n                | %    | $\bar{x}$ | SD   | $\bar{x}$    | SD   | $\bar{x}$ | SD   | $\bar{x}$ | SD   | $\bar{x}$     | SD   | $\bar{x}$ | SD   | $\bar{x}$           | SD   | $\bar{x}$ | SD   | $\bar{x}$ | SD   |  |
| Mean age (SD)    |                  | 35.7 (7.5)       |      |           |      |              |      |           |      |           |      |               |      |           |      |                     |      |           |      |           |      |  |
| Sex              | Female           | 145              | 69.0 | 69.0      | 10.1 | 52.8         | 14.3 | 78.1      | 13.0 | 64.3      | 11.3 | 69.7          | 15.0 | 66.8      | 14.8 | 67.4                | 20.8 | 67.8      | 14.0 | 65.7      | 14.5 |  |
|                  | Male             | 65               | 31.0 | 68.3      | 11.6 | 55.6         | 14.5 | 78.1      | 11.2 | 63.3      | 12.1 | 7.7           | 18.1 | 67.3      | 13.8 | 64.8                | 20.1 | 67.0      | 15.6 | 67.9      | 14.7 |  |
| Education        | Certificate/EN   | 76               | 36.2 | 67.0      | 10.7 | 49.9         | 15.3 | 74.7      | 13.4 | 61.9      | 11.4 | 65.1          | 15.7 | 64.7      | 14.6 | 64.2                | 23.1 | 65.9      | 15.8 | 61.8      | 17.0 |  |
|                  | Diploma (RN/AMO) | 116              | 55.2 | 69.3      | 10.3 | 55.0         | 13.4 | 79.6      | 11.9 | 64.5      | 11.6 | 70.4          | 15.6 | 69.2      | 14.0 | 68.4                | 17.9 | 68.2      | 13.4 | 68.4      | 12.6 |  |
|                  | Degree (RN/MD)   | 16               | 7.6  | 73.5      | 11.1 | 60.9         | 13.6 | 83.5      | 8.3  | 69.1      | 10.0 | 72.2          | 19.8 | 60.4      | 15.7 | 64.1                | 26.6 | 67.3      | 13.7 | 73.1      | 10.9 |  |
|                  | Others (MA/CA)   | 2                | 1.0  | 72.5      | 9.2  | 55.0         | 7.1  | 78.0      | 7.1  | 65.0      | 7.1  | 55.5          | 7.8  | 75.0      | 0.0  | 72.5                | 7.8  | 91.5      | 6.4  | 70.0      | 7.1  |  |
| Health Facility  | Dispensary       | 37               | 17.6 | 69.9      | 9.4  | 59.9         | 12.9 | 74.6      | 11.6 | 60.0      | 11.0 | 60.3          | 10.8 | 66.0      | 10.8 | 70.6                | 10.1 | 68.7      | 14.2 | 65.5      | 13.2 |  |
|                  | Health Centre    | 63               | 30.0 | 70.0      | 9.3  | 52.0         | 14.0 | 80.9      | 11.4 | 64.2      | 12.5 | 70.6          | 13.4 | 66.1      | 15.7 | 70.1                | 17.6 | 67.1      | 13.3 | 62.3      | 14.6 |  |
|                  | Hospital         | 110              | 52.4 | 67.8      | 11.5 | 52.5         | 14.7 | 77.7      | 13.0 | 65.1      | 10.8 | 70.0          | 18.1 | 67.8      | 14.9 | 63.3                | 24.0 | 67.3      | 15.3 | 69.0      | 14.5 |  |
| Region           | Tanga            | 70               | 33.3 | 67.0      | 9.2  | 53.1         | 14.0 | 79.7      | 12.6 | 65.1      | 11.3 | 68.0          | 15.5 | 59.0      | 16.1 | 71.8                | 15.7 | 66.4      | 13.3 | 62.7      | 16.3 |  |
|                  | Geita            | 78               | 37.1 | 71.3      | 11.3 | 52.0         | 15.3 | 79.1      | 13.0 | 62.7      | 11.2 | 69.5          | 17.9 | 72.7      | 10.7 | 59.4                | 25.6 | 68.2      | 14.0 | 73.1      | 12.6 |  |
|                  | Katavi           | 62               | 29.5 | 67.7      | 10.5 | 56.3         | 13.5 | 75.0      | 11.2 | 64.2      | 12.0 | 67.8          | 14.4 | 68.6      | 12.7 | 69.8                | 15.3 | 67.9      | 16.4 | 62.2      | 11.7 |  |
| District/Council | Tanga City       | 46               | 21.9 | 68.2      | 9.3  | 51.3         | 13.4 | 81.1      | 12.1 | 66.3      | 10.8 | 72.7          | 15.3 | 60.1      | 17.9 | 72.4                | 15.2 | 65.2      | 14.7 | 60.9      | 14.6 |  |
|                  | Muheza DC        | 24               | 11.4 | 64.5      | 8.7  | 56.7         | 14.6 | 77.1      | 13.2 | 62.9      | 12.2 | 59.0          | 11.7 | 56.9      | 12.2 | 70.6                | 16.9 | 68.8      | 10.0 | 66.3      | 19.0 |  |
|                  | Geita MC         | 47               | 22.4 | 71.1      | 11.5 | 52.4         | 17.4 | 79.8      | 13.6 | 65.3      | 10.9 | 70.1          | 18.1 | 75.2      | 10.1 | 61.9                | 24.5 | 69.0      | 14.0 | 76.9      | 13.6 |  |
|                  | Chato DC         | 31               | 14.8 | 71.7      | 11.2 | 51.4         | 12.0 | 78.2      | 12.1 | 59.0      | 10.9 | 68.5          | 17.8 | 69.1      | 10.9 | 55.7                | 27.2 | 66.9      | 14.0 | 67.3      | 8.3  |  |
|                  | Mpanda MC        | 31               | 14.8 | 65.5      | 11.7 | 53.1         | 13.3 | 77.6      | 9.5  | 68.8      | 12.0 | 72.7          | 11.7 | 71.2      | 14.5 | 71.9                | 18.8 | 68.0      | 14.0 | 57.1      | 10.2 |  |
|                  | Tanganyika DC    | 31               | 14.8 | 70.0      | 8.8  | 59.5         | 13.2 | 72.3      | 12.3 | 59.6      | 10.1 | 62.9          | 15.3 | 66.1      | 10.1 | 67.7                | 10.7 | 67.8      | 18.7 | 67.3      | 10.9 |  |

Key: CBAB; Controlling bleeding after birth, HBB; Helping babies breath, ECSB; Essential Care for Small Babies, MRP; Manual removal of placenta, AMTSL; active management of third stage of labour, AdMgSO<sub>4</sub>; Administration of Magnesium sulphate, HBB; Helping babies breathe, FNGT; Feeding with nasogastric tube

## 276 **Participants' knowledge retention scores**

277 Four knowledge areas were assessed including, two for care of the mother i.e. how to  
278 control bleeding after childbirth and managing pre-eclampsia, and two for the care of the  
279 newborn i.e. helping babies to breathe and essential care for small babies. Participants'  
280 mean follow-up knowledge (SD) score was highest for helping babies to breathe {78.1  
281 (12.4)} and lowest for managing pre-eclampsia {53.6 (14.4)}. Follow-up knowledge  
282 scores were compared to post-test knowledge scores (previously assessed) and the change  
283 in mean (SD) scores was computed to determine knowledge retention. The results show  
284 that there was a drop in mean knowledge score in all areas assessed with the highest drop  
285 observed in managing pre-eclampsia {-21.0 (15.0)} and lowest in helping babies to  
286 breathe {-7.7 (13.0)}.

287 A paired *t*-test was performed to assess the differences between the follow-up mean  
288 knowledge scores and the post-test mean knowledge scores (**Table 3**) to determine  
289 whether the observed drop in knowledge scores were significant. For all knowledge areas  
290 assessed, there were statistically significant drop in knowledge scores. Specifically, there  
291 was a statistically significant drop in mean knowledge scores for controlling bleeding  
292 after birth ( $t=15.404, p<0.001$ ), pre-eclampsia ( $t=20.276, p<0.001$ ), helping babies breath  
293 ( $t=8.580, p<0.001$ ), and essential care for small babies ( $t=19.620, p<0.001$ ).

294

295

296

297

298

299



**Table 3. Mean scores differences between follow-up and post-test knowledge scores**

| Area assessed | Post-test |     | Follow-up |      | Difference |      | Paired <i>t</i> -test |          |         |
|---------------|-----------|-----|-----------|------|------------|------|-----------------------|----------|---------|
|               | Mean      | SD  | Mean      | SD   | Mean       | SD   | 95%CI                 | <i>t</i> | p value |
| CBAB          | 81.3      | 7.3 | 68.8      | 10.5 | -12.5      | 11.7 | 10.86703, 14.05678    | 15.404   | <0.001  |
| Pre-eclampsia | 74.6      | 8.1 | 53.6      | 14.4 | -21.0      | 15.0 | 18.93671, 23.01567    | 20.276   | <0.001  |
| HBB           | 85.8      | 7.8 | 78.1      | 12.4 | -7.7       | 13.0 | 5.91977, 9.45166      | 8.580    | <0.001  |
| ECSB          | 78.6      | 7.3 | 64.0      | 11.5 | -14.7      | 10.8 | 16.12989, 19.620      | 19.620   | <0.001  |

Key: CBAB; Controlling bleeding after birth, HBB; Helping babies breath, ECSB; Essential Care for Small Babies, CI; confidence interval

300

301 An independent *t*-test was performed to compare the mean knowledge drop scores  
 302 between participants working in urban and rural areas. Participants working in rural area  
 303 had a statistically significant higher drop in mean knowledge scores for managing pre-  
 304 eclampsia ( $F=4.491$ ,  $p=0.035$ ) and for helping babies breath ( $F=5.005$ ,  $p=0.026$ ) (**Table**  
 305 **4**)

**Table 4. Univariate analysis of variance of knowledge according to residential area**

| Measure       | Urban |      | Rural |      | Independent <i>t</i> -test |       |          |
|---------------|-------|------|-------|------|----------------------------|-------|----------|
|               | Mean  | SD   | Mean  | SD   | F (1, 208)                 | Sig.  | $\eta^2$ |
| CBAB          | -13.3 | 11.7 | -11.2 | 11.7 | 1.677                      | 0.197 | 0.008    |
| Pre-eclampsia | -22.8 | 15.7 | -18.4 | 13.7 | 4.491                      | 0.035 | 0.021    |
| HBB           | -6.0  | 13.2 | -10.0 | 12.4 | 5.005                      | 0.026 | 0.023    |
| ECSB          | -13.7 | 10.4 | -16.0 | 11.3 | 2.421                      | 0.121 | 0.012    |

Key: CBAB; Controlling bleeding after birth, HBB; Helping babies breath, ECSB; Essential Care for Small Babies, CI; confidence interval  $\eta^2$ ; F;Eta Squared,

306

307 Another statistical analysis that was performed for assessment of knowledge drop was the  
 308 One-Way ANOVA to determine differences in mean knowledge scores among  
 309 participants according to their levels of professional education i.e. holders of certificate,  
 310 diploma, degree, and others (**Table 5**). There was a statistically significant difference only  
 311 in the mean knowledge score for managing pre-eclampsia ( $F=4.850, p=0.003$ ). When the  
 312 Post Hoc Test was performed it was revealed that there were statistically significant mean  
 313 knowledge differences in pre-eclampsia between certificate holders and diploma holders  
 314 ( $p=0.006$ ), and between certificate holders and degree holders ( $p=0.037$ ). There were no  
 315 significant differences in knowledge variance with other levels of professional education.

**Table 5. One-Way ANOVA by level of professional education**

| Measure       |                | Sum of squares | Mean square | F (3, 206) | <i>p</i> value |
|---------------|----------------|----------------|-------------|------------|----------------|
| CBAB          | Between Groups | 528.591        | 176.197     | 1.287      | 0.280          |
|               | Within Groups  | 28197.604      | 136.882     |            |                |
|               | Total          | 28726.195      |             |            |                |
| Pre-eclampsia | Between Groups | 3099.223       | 1033.074    | 4.850      | 0.003          |
|               | Within Groups  | 43875.658      | 212.989     |            |                |
|               | Total          | 46974.881      |             |            |                |
| HBB           | Between Groups | 474.154        | 158.051     | 0.937      | 0.424          |
|               | Within Groups  | 34745.103      | 168.666     |            |                |
|               | Total          | 35219.257      |             |            |                |
| ECSB          | Between Groups | 381.232        | 127.077     | 1.086      | 0.356          |
|               | Within Groups  | 24114.083      | 117.059     |            |                |
|               | Total          | 24495.314      |             |            |                |

Key: CBAB; Controlling bleeding after birth, HBB; Helping babies breath, ECSB; Essential Care for Small Babies

316

### 317 **Participants' skills retention scores**

318 Five skills areas were assessed including, three for the care of the mother i.e. the manual  
 319 removal of placenta, active management of the third stage of labour, and administration  
 320 of magnesium sulphate, and two for the care of the newborn i.e. helping babies breathe  
 321 and feeding with a nasal gastric tube. Participants' follow-up mean skills (SD) score was

322 highest for manual removal of placenta {68.5 (16.1)} and lowest for feeding with nasal  
323 gastric tube {66.4 (14.6)}. The results showed that there was a drop in mean skills scores  
324 in all areas assessed with the highest drop observed in the administration of magnesium  
325 sulphate {-17.1 (18.7)} and lowest in helping babies breathe {-11.1 (11.0)}.

326

327 A paired *t*-test was performed to assess the differences between the follow-up mean skills  
328 scores and the post-test skills mean scores (**Table 6**) to determine whether the changes in  
329 skills scores were statistically significant. In all skills areas assessed, a statistically  
330 significant drop in scores was observed. Specifically, there was a significant drop in mean  
331 skill scores for manual removal of placenta ( $t=13.427, p<0.001$ ), active management of  
332 third stage of labour ( $t=15.840, p<0.001$ ), administration of magnesium sulphate  
333 ( $t=13.210, p<0.001$ ), helping babies breathe ( $t=14.609, p<0.001$ ), and feeding with nasal  
334 gastric tube ( $t=16.113, p<0.001$ )

**Table 6. Mean scores differences between follow-up and post-test skills scores**

|                     | Post-test |         | Follow-up |          | Difference |          | Paired <i>t</i> -test |          |         |
|---------------------|-----------|---------|-----------|----------|------------|----------|-----------------------|----------|---------|
|                     | Mean      | SD      | Mean      | SD       | Mean       | SD       | 95%CI                 | <i>t</i> | p value |
| MRP                 | 83.6000   | 7.88688 | 68.4905   | 16.07912 | -15.1095   | 16.30723 | 12.89112, 17.32793    | 13.427   | <0.001  |
| AMTSL               | 83.9952   | 8.15255 | 66.9571   | 14.47694 | -17.0381   | 15.58795 | 14.91754, 19.15865    | 15.840   | <0.001  |
| AdMgSO <sub>4</sub> | 83.6268   | 9.49162 | 66.6048   | 20.56920 | -17.0766   | 18.68859 | 14.52805, 19.62506    | 13.210   | <0.001  |
| HBB                 | 78.6190   | 7.54747 | 67.5095   | 14.45178 | -11.1095   | 11.02031 | 9.61034, 12.60871     | 14.609   | <0.001  |
| FNGT                | 78.8571   | 7.13027 | 66.4048   | 14.56886 | -12.4524   | 11.19895 | 10.92890, 13.97586    | 16.113   | <0.001  |

Key: MRP; Manual removal of placenta, AMTSL; active management of third stage of labour, AdMgSO<sub>4</sub>; Administration of magnesium sulphate, HBB; Helping babies breathe, FNGT; Feeding with nasogastric tube, CI; confidence interval

335

336

**Table 7. Univariate analysis of variance of skills according to residential area**

| Measure             | Urban |      | Rural |      | Independent <i>t</i> -test |                |                |
|---------------------|-------|------|-------|------|----------------------------|----------------|----------------|
|                     | Mean  | SD   | Mean  | SD   | F (1, 208)                 | <i>p</i> value | η <sup>2</sup> |
| MRP                 | -11.6 | 15.3 | -20.2 | 16.5 | 14.917                     | <0.001         | 0.067          |
| AMTSL               | -14.8 | 16.1 | -20.2 | 14.3 | 6.271                      | 0.013          | 0.029          |
| AdMgSO <sub>4</sub> | -15.4 | 17.5 | -19.4 | 20.2 | 2.356                      | 0.126          | 0.011          |
| HBB                 | -12.1 | 11.6 | -9.7  | 10.0 | 2.367                      | 0.125          | 0.011          |
| FNGT                | -13.1 | 12.1 | -11.5 | 9.8  | 1.028                      | 0.312          | 0.005          |

Key: MRP; Manual removal of placenta, AMTSL; active management of third stage of labour, AdMgSO<sub>4</sub>; Administration of magnesium sulphate, HBB; Helping babies breathe, FNGT; Feeding with nasogastric tube, CI; confidence interval η<sup>2</sup>; Eta Squared

337

338 An independent *t*-test (**Table 7**) was also performed to compare the mean skills drop scores between  
 339 participants working in urban and rural areas. Participants working in rural area had a statistically  
 340 significant higher drop in mean skills scores for manual removal of placenta ( $F=14.917, p<0.001$ ),  
 341 and for active management of the third stage of labour ( $F=6.271, p=0.013$ ).  
 342 A One-Way ANOVA was performed to assess differences in skills drop scores among participants  
 343 according to their levels of professional education i.e. holders of certificate, diploma, degree, and  
 344 others (**Table 8**). There was a statistically significant difference within groups only in the skills for  
 345 feeding with nasogastric tube ( $F=2.713, p=0.046$ ).  
 346

**Table 8. One Way Analysis of Variance of skills by level of professional education**

| Measure |                | Sum of squares | Mean square | F (3, 206) | <i>p</i> value |
|---------|----------------|----------------|-------------|------------|----------------|
| MRP     | Between Groups | 1207.331       | 402.444     | 1.525      | 0.209          |
|         | Within Groups  | 54371.150      | 263.938     |            |                |
|         | Total          | 55578.481      |             |            |                |
| AMTSL   | Between Groups | 1337.333       | 445.778     | 1.857      | 0.138          |
|         | Within Groups  | 49446.362      | 240.031     |            |                |
|         | Total          | 50783.695      |             |            |                |
| AdMgSO4 | Between Groups | 1253.140       | 417.713     | 1.199      | 0.311          |
|         | Within Groups  | 71393.636      | 348.262     |            |                |
|         | Total          | 72646.775      |             |            |                |
| HBB     | Between Groups | 716.457        | 238.819     | 1.995      | 0.116          |
|         | Within Groups  | 24666.024      | 119.738     |            |                |
|         | Total          | 25382.481      |             |            |                |
| FNGT    | Between Groups | 996.368        | 332.123     | 2.713      | 0.046          |
|         | Within Groups  | 25215.656      | 122.406     |            |                |
|         | Total          | 26212.024      |             |            |                |

Key: Key: MRP; Manual removal of placenta, AMTSL; active management of third stage of labour, AdMgSO4; Administration of magnesium sulphate, HBB; Helping babies breathe, FNGT; Feeding with nasogastric tube

## 347 **Factors influencing the knowledge and skills retention**

### 348 **1. Learning materials**

#### 349 **a. Availability of learning materials**

350 Participants reported the availability of learning materials such as handouts, and reference books as  
351 a crucial factor for knowledge and skills retention. Learning materials allow learners to review,  
352 reinforce, and apply the concepts and skills they have acquired in the classroom. Handouts and  
353 reference books can also serve as feedback, guidance, and self-assessment sources for learners. By  
354 having access to learning materials, learners can enhance their understanding, deepen their memory,  
355 and transfer their knowledge to new situations.

356 *“For example, when you are given out a handout, and revise every time, it will help you to*  
357 *build experience. Although you may not be able to attend to a patient physically but it will*  
358 *assist to read the references and help put your knowledge intact.” (FGD Tanga)*

359

#### 360 **b. Topic revision in CMEs**

361 Participants highlighted the importance of topic revision during the Clinical Medical Education  
362 sessions (CMEs) as one of the factors enhancing knowledge and skills retention. Topic revision is a  
363 factor for knowledge retention because it helps learners consolidate their learning and recall it more  
364 easily. Moreover, revising topics after a gap can strengthen memory traces and make them more  
365 resistant to forgetting.

366 *“We normally have learning sessions at our facility; we have a teaching plan. Therefore, every*  
367 *Wednesday we prepare a lesson. We prepare maybe this week it will be eclampsia, next week*  
368 *it will be PPH, and we learn through those also we get experience.” (FGD Tanga)*

369

#### 370 **c. Establishment of a learning corner**

371 Participants reported the establishment of a learning corner as another factor for knowledge retention  
372 because it provides a space where learners can actively engage with the content and review the  
373 material at their own pace. A learning corner can also help learners apply their knowledge to real-  
374 world scenarios and problems, which can increase their confidence and competence. Participants

375 declared the presence of a learning corner that they use to refresh their knowledge and skills in the  
376 provision of maternal and newborn care.

377 *“There are times, you may have what we call ‘learning corner’. Sometimes you may not have a*  
378 *client and the labour ward is calm no any challenge. Therefore, you go to the small room where*  
379 *there is a learning corner there we have manikins ‘Mama Natalie, Mama Besiye, Mama Yu’ and*  
380 *other manikins. Therefore, we are able to learn from those manikins at the end of the day you can*  
381 *come across a real case or real patient and you can recall what you have gained or this and we*  
382 *transfer (the knowledge and skills) to the real patient” (IDI, GRRH)*

383

## 384 **2. Mentorship and supportive supervision**

385 Participants highlighted that they need to have mentorship and supervision by being followed up to  
386 ensure they master the content that has been taught during the training. Mentorship and supportive  
387 supervision were reported to help them learn from experienced mentors, receive constructive  
388 feedback, and improve their skills and performance. Mentorship and supportive supervision also  
389 foster a culture of learning and collaboration, where providers can share their knowledge and insights  
390 with each other.

391 *“Mentorship should be done and supervision from our experts from CHMT and when they do*  
392 *supervision several times, they bring you back to class and do the required process which is*  
393 *needed in the trained issues” (IDI, Kasamwa)*

394

## 395 **3. Practice**

### 396 **a. Frequent practice of the procedure**

397 Participants responded that having opportunities for frequent practice of the procedure tends to  
398 enhance knowledge and skills retention. Frequent practice of the procedure is a crucial factor for  
399 knowledge and skills retention. Frequent practice helps them to consolidate their memory, build

400 confidence and refine their performance, and overcome challenges. Without frequent practice,  
401 learners may forget the steps of the procedure, lose confidence, and make errors.

402 *“Okay, the big thing is that we should not get tired of practicing at all! When you do...you practice*  
403 *a lot it builds...builds confidence and ability in a sense that you will not forget because you have*  
404 *touched it with your own hands meaning it will remain in your mind what you did...therefore*  
405 *every day the weapon is to practice nothing else.” (FGD Muheza)*

406

#### 407 **b. Attending cases following the topics that they have been trained**

408 Participants responded that attending cases following the topics that they have been trained in is one  
409 factor that can influence their knowledge retention and performance. By attending cases, they can  
410 reinforce their learning, gain confidence and feedback, and adapt to different contexts and scenarios.

411 *“...it helps to remain with knowledge when we meet a case several times. For example, at that*  
412 *time we received training on manual removal of the placenta. Within that same week, I went and*  
413 *attended the case, and I found that I was able to manage it. Therefore, when we get several cases,*  
414 *we keep on learning.” (FGD Tanga)*

415

#### 416 **4. Staff rotation/shifting**

417 Participants have further reported staff rotation or shifting as another factor that positively and  
418 negatively influences knowledge and skills retention. Staff rotation or shifting is the practice of  
419 assigning healthcare providers to different tasks or positions within a facility. This can have various  
420 benefits and challenges for knowledge and skills retention. On the other hand, staff rotation can lead  
421 to some risks for knowledge and skills retention, such as loss of hands-on skills, reduced efficiency,  
422 and increased training costs (need for re-training).

423 *“...when shifted to another unit loses the skills, because if you do not practice for a long*  
424 *time...as time goes on you keep on forgetting (IDI, Katavi)”*

425



426 *“First it is supposed that midwife work in the same maternity unit, and after taking training*  
427 *may be of helping the baby to breathe and then you take to the surgical ward or medical ward,*  
428 *there you have not helped, therefore after training the first thing is to remain in the maternity*  
429 *unit” (IDI, Ilembo)*

430

431 *“Skills, to retain skills is when someone is working in the same unit meaning for example after*  
432 *training, then works for at least for some time maybe six months. He/she keeps working in the*  
433 *labour unit where training was conducted helps to gain the skills and retain them for a longer*  
434 *period. But if after training, she/he is shifted from labour and goes to maybe OPD...when*  
435 *she/he goes back the skills will be gone since has not practised them...” (IDI, Kasamwa)*

436

## 437 **5. Training**

438 Training is another factor for knowledge and skills retention that the participants have described.  
439 Training can take various forms, such as retaining on-the-job training, teaching others, self-directed  
440 learning through individual revision, receiving updates on evidence based practice etc. Training  
441 through these various forms can enhance knowledge and skills retention by increasing the confidence,  
442 competence, and commitment of healthcare providers.

443 *“...doing sessions every week and we do on-job training...For example, when we receive an*  
444 *emergency PPH case, when you provide the care, you are with fellow providers...and we*  
445 *teach each other” (IDI, Buga)*

446

447 *“In my opinion, I think this training should be conducted several times. Therefore, if this*  
448 *group receives training after some time you prepare training for another group. It will help*  
449 *people at work very much. You know when you receive on-the-job training again it helps a lot*  
450 *and builds morale and competence.” (FGD, Tanga).*

451

452           “...because, for you to be able to have more education and stick in your head it is when you  
453           teach others. When you keep on teaching others things and things keep on sticking into your  
454           head therefore eventually your competence will be improved and people will receive high-  
455           quality services.”(FGD, Muheza)

456

## 457       **6. Availability of equipment**

458       Participants also highlighted the availability of equipment as a factor influencing knowledge and  
459       skills retention among healthcare providers. This is because it enables providers to apply their  
460       learning in practice and improve their performance. However, the availability of equipment alone is  
461       not sufficient for knowledge and skills retention. Receiving adequate training needs to go along with  
462       the availability of equipment.

463           “...for example, if you have enough equipment, they also assist you to give good services with  
464           the required skills. But if you have scarce equipment also it becomes a challenge to give  
465           quality services and remain with the skills...but when you have enough equipment you provide  
466           good service properly.” (IDI, Buga).

467

## 468       **Discussion**

469       This was a mixed methods study aimed to assess factors influencing healthcare providers’ knowledge  
470       and skills retention following Helping Mothers Survive and Helping Babies Survive Training.  
471       Regarding knowledge, there was a significant drop in the four domains assessed including how to  
472       control bleeding after childbirth, managing pre-eclampsia, helping babies to breathe, and essential  
473       care for small babies. Similarly, there was a significant drop in the five skills areas assessed including  
474       the manual removal of placenta, active management of the third stage of labor, administration of  
475       magnesium sulphate, helping babies breathe, and feeding with a nasal gastric tube. A significant drop  
476       in specific knowledge and skills domains was higher among healthcare providers with lower  
477       professional education and those working in rural areas. Qualitatively, reported facilitators of

478 knowledge and skills retention encompassed the availability of learning materials, frequent practice,  
479 mentorship and supportive supervision, on-job training, and staff rotation/shifting.

480

481 The current study demonstrates a statistically significant drop in knowledge and skills scores among  
482 healthcare providers following receiving the training on Helping Mothers Survive and Helping Babies  
483 Survive, indicating a decrease in knowledge and skills retention over time. A similar situation was  
484 observed in Uganda and Sudan where knowledge and skills regarding helping babies breathe among  
485 midwives fell by 12 months post-training [39, 40]. On the contrary, a previous study in the country  
486 which focused on one similar domain (Helping Mothers Survive Bleeding After Birth) reported that  
487 knowledge and simulated basic delivery skills decayed after nine months, while confidence and  
488 simulated obstetric emergency skills were largely retained [35]. Moreover, a study in Ethiopia  
489 reported an overall strong retention of knowledge and skills among health workers following maternal  
490 and newborn health training [41].

491 Various factors have been implicated in the maternal and neonatal care knowledge and skills retention  
492 including refresher training [40]. This is supported by a multi-country longitudinal study which  
493 showed that, after training, healthcare providers retain knowledge and skills for up to 12 months, the  
494 effect which likely enhanced by short repeat skills-training sessions, or, ‘fire drills’ [36]. Our findings  
495 from the qualitative arm emphasized the role of on-job training in enhancing essential maternal and  
496 newborn care knowledge and skills retention among healthcare providers.

497 Participants working in urban areas had a statistically significant higher drop in mean knowledge for  
498 managing pre-eclampsia and a statistically significant lower drop in mean knowledge for helping  
499 babies breathe. On the other hand, participants working in rural area had a statistically significant  
500 higher drop in mean skills for manual removal of placenta and active management of third stage of  
501 labor. This indicates differences experienced in knowledge and skills retention in the two settings. As  
502 reported in a previous study [42], there is scarcity of literature on professional education, training or  
503 continuous professional development in maternity care in remote and rural settings that can be

504 compared with urban settings. However, the observed differences could be multifaceted and related  
505 to several factors, including differences in clinical exposure and experience, resource availability, and  
506 institutional practices [43, 44].

507 With regard to the level of professional education, certificate holder had a statistically significant  
508 higher drop in mean knowledge for pre-eclampsia compared to holders of diploma and degree. The  
509 differences in drop of mean skills was not significant. This implies that knowledge retention drop was  
510 much more experienced by the holders of certificate. This is supported by a previous study in  
511 Tanzania which found that professional qualification and experience in a maternity care settings are  
512 significant factors influencing not only nurses' knowledge, but also skills [45]. The possible  
513 explanation is that healthcare workers with lower levels of professional education may have a weaker  
514 foundation in medical knowledge and clinical skills, leading to a more rapid decline in retained  
515 information [46].

516 Our study found that working in a hospital had a significantly higher drop in pre-eclampsia mean  
517 knowledge compared to those working in a dispensary. However, the situation was vice versa for  
518 skills for manual removal of placenta where healthcare providers working in dispensaries had a higher  
519 drop compared to those working in hospitals. This implies healthcare providers in hospitals and  
520 dispensaries had different experiences in various aspects of knowledge and skills retention. A  
521 previous multi-country study indicated that health care facility level was not a determinant of  
522 knowledge and skills retention among healthcare providers [36]. Various factors affecting each level  
523 of health facilities differently such as work experience, training type, training frequency, availability  
524 of equipment and facilities, and healthcare providers' educational background may explain the  
525 observed differences in knowledge and skills retention [46]. Therefore, this highlights that health  
526 facility-specific factors should be considered to enhance healthcare providers' knowledge and skills  
527 retention following training.

528 Our findings from the qualitative arm has highlighted the availability of learning materials, frequent  
529 practice, mentorship and supportive supervision, on-job training, and staff rotation/shifting as

530 fractionators of knowledge and skills retention among healthcare providers. The identification of  
531 these factors emphasize that these are important factors to be considered to enhance knowledge and  
532 skills retention among healthcare providers. As discussed above, various studies support these findings  
533 [40, 43–46]. This implies that factors influencing knowledge and skills retention are multifaceted in  
534 nature and underscores the role of contextual considerations in addressing the phenomenon.  
535 There are some strengths and limitations that are noteworthy in this study. Using a mixed design, the  
536 study draws its strength from the triangulation of information from both quantitative and qualitative  
537 arms. Findings from the qualitative arm were key in complementing the quantitative results.  
538 Moreover, the mix of urban and rural settings and various health facility levels provide a good sample  
539 representation of the study population. On the other hand, this study might have been influenced by  
540 social desirability limitation, particularly with the qualitative arm as healthcare providers might want  
541 to provide desirable responses regarding factors influencing the knowledge and skills retention.  
542 However, they were assured of confidentiality and encouraged to provide honest responses to mitigate  
543 social desirability. However, we believe that this study provides invaluable insights regarding factors  
544 associated with knowledge and skills retention and among healthcare providers following the Helping  
545 Mothers Survive and Helping Babies Survive Training.

546

## 547 **Conclusion**

548 This study highlights low level of knowledge and skills retention among healthcare providers  
549 following the Helping Mothers Survive and Helping Babies Survive training, with organizational  
550 factors being mainly associated. This underscores the need to address organizational barriers such as  
551 making available the learning materials, providing mentorship and supportive supervision, and  
552 conducting frequent on-job training to enhance knowledge and skills retention regarding maternal  
553 and child care among healthcare providers.

554

## 555 **Acknowledgements**

556 We would like to thank all the HCPs who agreed to take part in the study and their willingness to  
557 share their insights regarding factors influencing competence retention. We extend our sincere  
558 gratitude to Laerdal Foundation for funding this study. Finally, we thank the assistant researchers  
559 who worked diligently in data collection. All regional and district authorities which gave us  
560 permission to conduct this study are acknowledged.

561

## 562 **Author Contributions**

563 BEM, MR, FM and LM conceptualized the study, and were involved in analysis; BEM, MR, LM,  
564 and JA performed formal data analysis; BEM, JA, and RG were involved in writing the original draft  
565 and BEM, LM, MR, FM, RG, NK, JA contributed in writing – review and editing. Both authors  
566 revised and approved the final manuscript.

567

## 568 **References**

- 569 [1] WHO U, WBG U. Trends in maternal mortality 2000 to 2020: estimates by WHO, UNICEF,  
570 UNFPA, World Bank Group and UNDESA/Population Division.
- 571 [2] Lawrence ER, Klein TJ, Beyuo TK. Maternal Mortality in Low and Middle-Income  
572 Countries. *Obstet Gynecol Clin North Am* 2022; 49: 713–733.
- 573 [3] Bauserman M, Thorsten VR, Nolen TL, et al. Maternal mortality in six low and lower-middle  
574 income countries from 2010 to 2018: risk factors and trends. *Reprod Health* 2020; 17: 173.
- 575 [4] UNICEF. Neonatal mortality, <https://data.unicef.org/topic/child-survival/neonatal-mortality/>  
576 (2022, accessed 30 June 2024).
- 577 [5] WHO. Newborn mortality, [https://www.who.int/news-room/fact-sheets/detail/newborn-  
578 mortality#:~:text=There are approximately 6500 newborn,to 2.3 million in 2022. \(2024,  
579 accessed 30 June 2024\).](https://www.who.int/news-room/fact-sheets/detail/newborn-mortality#:~:text=There are approximately 6500 newborn,to 2.3 million in 2022. (2024,)
- 580 [6] TDHS - MIS. Tanzania Demographic and Health Survey and Malaria Indicator 2022,  
581 <https://dhsprogram.com/pubs/pdf/PR144/PPR144.pdf> (2023, accessed 30 June 2024).

- 582 [7] United Nations. Standard Developmental Goals, <https://sdgs.un.org/goals> (2015, accessed 1  
583 July 2024).
- 584 [8] Kapologwe NA, Meara JG, Kengia JT, et al. Development and upgrading of public primary  
585 healthcare facilities with essential surgical services infrastructure: a strategy towards  
586 achieving universal health coverage in Tanzania. *BMC Health Serv Res* 2020; 20: 218.
- 587 [9] Sirili N. Health workforce development post-1990s health sector reforms: the case of medical  
588 doctors in Tanzania.
- 589 [10] UNFPA. Boosting the health workforce in Tanzania,  
590 <https://tanzania.unfpa.org/en/news/boosting-health-workforce-tanzania> (2020, accessed 30  
591 June 2024).
- 592 [11] WHO. New global targets to prevent maternal deaths, [https://www.who.int/news/item/05-10-  
593 2021-new-global-targets-to-prevent-maternal-deaths](https://www.who.int/news/item/05-10-2021-new-global-targets-to-prevent-maternal-deaths) (2021).
- 594 [12] Walker T, Woldegiorgis M, Bhowmik J. Utilisation of skilled birth attendant in low-and  
595 middle-income countries: trajectories and key sociodemographic factors. *Int J Environ Res  
596 Public Health* 2021; 18: 10722.
- 597 [13] TDHS - MIS. 2015-16 Demographic and Health Survey and Malaria Indicator Survey,  
598 <https://www.dhsprogram.com/pubs/pdf/SR233/SR233.pdf> (2017, accessed 29 June 2024).
- 599 [14] Shimamoto K, Gipson JD. The relationship of women's status and empowerment with  
600 skilled birth attendant use in Senegal and Tanzania. *BMC Pregnancy Childbirth* 2015; 15: 1–  
601 11.
- 602 [15] Organization WH. Trends in maternal mortality 2000 to 2017: estimates by WHO, UNICEF,  
603 UNFPA, World Bank Group and the United Nations Population Division.
- 604 [16] JHPIEGO. Why Skilled Birth Attendants Matters,  
605 <https://www.jnj.com/sites/default/files/pdf/skilled-birth-attendants-infographic.pdf> (2019,  
606 accessed 30 June 2024).
- 607 [17] Ersdal HL, Singhal N, Msemu G, et al. Successful implementation of Helping Babies

- 608 Survive and Helping Mothers Survive programs—An Utstein formula for newborn and  
609 maternal survival. *PLoS One* 2017; 12: e0178073.
- 610 [18] Msemu G, Massawe A, Mmbando D, et al. Newborn mortality and fresh stillbirth rates in  
611 Tanzania after helping babies breathe training. *Pediatrics* 2013; 131: e353–e360.
- 612 [19] Evans CL, Kamunya R, Tibaijuka G. Using helping mothers survive to improve intrapartum  
613 care. *Pediatrics* 2020; 146: S218–S222.
- 614 [20] Dol J, Campbell-Yeo M, Bulemela J, et al. Knowledge acquisition after Helping Babies  
615 Survive training in rural Tanzania. *Int Health* 2019; 11: 136–142.
- 616 [21] JHPIEGO. Helping Mothers Survive, [https://hms.jhpiego.org/wp-](https://hms.jhpiego.org/wp-content/uploads/2016/08/hms-implementation-guide.pdf)  
617 [content/uploads/2016/08/hms-implementation-guide.pdf](https://hms.jhpiego.org/wp-content/uploads/2016/08/hms-implementation-guide.pdf) (2016, accessed 1 July 2024).
- 618 [22] JHPIEGO. Helping Mothers Survive, <https://www.jhpiego.org/hms/> (2015, accessed 1 July  
619 2024).
- 620 [23] JHPIEGO, Laerdal Global Health. Helping Mothers and Babies Survive,  
621 <https://hmbs.org/about/> (2015, accessed 1 July 2024).
- 622 [24] Ljungblad LW, Sandvik SO, Lyberg A. The impact of skilled birth attendants trained on  
623 newborn resuscitation in Tanzania: A literature review. *Int J Africa Nurs Sci* 2019; 11:  
624 100168.
- 625 [25] Ameh C, Adegoke A, Hofman J, et al. The impact of emergency obstetric care training in  
626 Somaliland, Somalia. *Int J Gynecol Obstet* 2012; 117: 283–287.
- 627 [26] Ameh CA, Mdegela M, White S, et al. The effectiveness of training in emergency obstetric  
628 care: a systematic literature review. *Health Policy Plan* 2019; 34: 257–270.
- 629 [27] Al-Beity FA, Pembe A, Hirose A, et al. Effect of the competency-based Helping Mothers  
630 Survive Bleeding after Birth (HMS BAB) training on maternal morbidity: a cluster-  
631 randomised trial in 20 districts in Tanzania. *BMJ Glob Heal* 2019; 4: e001214.
- 632 [28] Nelissen E, Ersdal H, Mduma E, et al. Clinical performance and patient outcome after  
633 simulation-based training in prevention and management of postpartum haemorrhage: an



- 634 educational intervention study in a low-resource setting. *BMC Pregnancy Childbirth* 2017;  
635 17: 1–9.
- 636 [29] Evans CL, Bazant E, Atukunda I, et al. Peer-assisted learning after onsite, low-dose, high-  
637 frequency training and practice on simulators to prevent and treat postpartum hemorrhage  
638 and neonatal asphyxia: a pragmatic trial in 12 districts in Uganda. *PLoS One* 2018; 13:  
639 e0207909.
- 640 [30] Goudar SS, Somannavar MS, Clark R, et al. Stillbirth and newborn mortality in India after  
641 helping babies breathe training. *Pediatrics* 2013; 131: e344–e352.
- 642 [31] Van den Broek N, Ameh C, Madaj B, et al. Effects of emergency obstetric care training on  
643 maternal and perinatal outcomes: a stepped wedge cluster randomised trial in South Africa.  
644 *BMJ Glob Heal* 2019; 4: e001670.
- 645 [32] Rowe AK, De Savigny D, Lanata CF, et al. How can we achieve and maintain high-quality  
646 performance of health workers in low-resource settings? *Lancet* 2005; 366: 1026–1035.
- 647 [33] Nelissen E, Ersdal H, Østergaard D, et al. Helping mothers survive bleeding after birth: An  
648 evaluation of simulation-based training in a low-resource setting. *Acta Obstet Gynecol Scand*  
649 2014; 93: 287–295.
- 650 [34] Alwy Al-beity F, Pembe AB, Marrone G, et al. Predictors of change of health workers’  
651 knowledge and skills after the Helping Mothers Survive Bleeding after Birth (HMS BAB) in-  
652 facility training in Tanzania. *PLoS One* 2020; 15: e0232983.
- 653 [35] Nelissen E, Ersdal H, Mduma E, et al. Helping Mothers Survive Bleeding After Birth:  
654 retention of knowledge, skills, and confidence nine months after obstetric simulation-based  
655 training. *BMC Pregnancy Childbirth* 2015; 15: 190.
- 656 [36] Ameh CA, White S, Dickinson F, et al. Retention of knowledge and skills after Emergency  
657 Obstetric Care training: A multi-country longitudinal study. *PLoS One* 2018; 13: e0203606.
- 658 [37] Ameh CA, Kerr R, Madaj B, et al. Knowledge and Skills of Healthcare Providers in Sub-  
659 Saharan Africa and Asia before and after Competency-Based Training in Emergency

- 660           Obstetric and Early Newborn Care. *PLoS One* 2016; 11: e0167270.
- 661 [38] Evans CL, Johnson P, Bazant E, et al. Competency-based training “Helping Mothers  
662           Survive: Bleeding after Birth” for providers from central and remote facilities in three  
663           countries. *Int J Gynecol Obstet* 2014; 126: 286–290.
- 664 [39] Draiko CV, Yamarat K, Panza A, et al. Knowledge, skills and competency retention among  
665           health workers one year after completing helping babies breathe training in South Sudan. *Pan  
666           Afr Med J* 2019; 33: 1–13.
- 667 [40] Mildenberger C, Ellis C, Lee K. Neonatal resuscitation training for midwives in Uganda:  
668           Strengthening skill and knowledge retention. *Midwifery* 2017; 50: 36–41.
- 669 [41] Gobezaayehu AG, Mohammed H, Dynes MM, et al. Knowledge and Skills Retention Among  
670           Frontline Health Workers: Community Maternal and Newborn Health Training in Rural  
671           Ethiopia. *J Midwifery Womens Health* 2014; 59: 1–11.
- 672 [42] Ireland J, Bryers H, Van Teijlingen E, et al. Competencies and skills for remote and rural  
673           maternity care: a review of the literature. *J Adv Nurs* 2007; 58: 105–115.
- 674 [43] Yang C-W, Yen Z-S, McGowan JE, et al. A systematic review of retention of adult advanced  
675           life support knowledge and skills in healthcare providers. *Resuscitation* 2012; 83: 1055–  
676           1060.
- 677 [44] Binkhorst M, Coopmans M, Draaisma JMT, et al. Retention of knowledge and skills in  
678           pediatric basic life support amongst pediatricians. *Eur J Pediatr* 2018; 177: 1089–1099.
- 679 [45] Angelina JA, Kibusi SM, Mwampagatwa I. Factors influencing nurses’ knowledge and skills  
680           in the prevention and management of postpartum haemorrhage. *Afr J Midwifery Womens  
681           Health*; 13. Epub ahead of print October 2019. DOI: 10.12968/ajmw.2018.0018.
- 682 [46] Junli A, Isa SNI, Ibrahim FS. Factors of cardiopulmonary resuscitation skills retention  
683           among healthcare providers: A scoping review. *Nurse Educ Pract* 2023; 69: 103617.

684

## 685 **Supporting Information**

686 DATA SET ZIPPED FOLDER
